# Supplementary material for: Maternal Sociodemographic Factors and Antenatal Stress
Source: MDPI journal article supplement (doi:10.3390/ijerph18136812), 2021-06-25
Supplement: s1 [file s1]

Table S1. Extract from the Sociodemographic and Clinical Questionnaire

|                                                      |  |
|------------------------------------------------------|--|
| Study ID:                                            |  |
| Information Collected by:                            |  |
| Date:                                                |  |
|                                                      |  |
| Contact Information                                  |  |
| Cell phone No.                                       |  |
| Area of residence/community                          |  |
| Alternate contact Cell phone No.                     |  |
| Alternate contact relationship to study participant: |  |

#### Demographic Information

|                                     |                                                                                                                                                                                                                                                                                                                                                 |
|-------------------------------------|-------------------------------------------------------------------------------------------------------------------------------------------------------------------------------------------------------------------------------------------------------------------------------------------------------------------------------------------------|
| 1. Mother born in Kenya             | <input type="checkbox"/> Kenya<br><input type="checkbox"/> Yes<br><input type="checkbox"/> No<br>If no, how long has she lived in Kenya... Years... months                                                                                                                                                                                      |
| 2. Mother's Age                     | _____ Years                                                                                                                                                                                                                                                                                                                                     |
| 3. Mother's ethnic background       | <input type="checkbox"/> Luo<br><input type="checkbox"/> Kuria<br><input type="checkbox"/> Kisii<br><input type="checkbox"/> Mixed/Other:<br>_____                                                                                                                                                                                              |
| 4. Mother's highest education level | <input type="checkbox"/> No Education<br><input type="checkbox"/> Primary level<br><input type="checkbox"/> Secondary level<br><input type="checkbox"/> Technical college/Trade<br><input type="checkbox"/> Professional college<br><input type="checkbox"/> University Bachelor's degree<br><input type="checkbox"/> University [Master's PhD] |

|                                          |                                                                                                                                                                                                                                                                                                                                                                    |
|------------------------------------------|--------------------------------------------------------------------------------------------------------------------------------------------------------------------------------------------------------------------------------------------------------------------------------------------------------------------------------------------------------------------|
| 4. Mother's Occupation                   | <input type="checkbox"/> House wife<br><input type="checkbox"/> Self employed<br><input type="checkbox"/> Government job<br><input type="checkbox"/> Private job<br><input type="checkbox"/> Other, specify: _____                                                                                                                                                 |
| 5. Mother's income per month (net)       | <input type="checkbox"/> Less than KES 5,000<br><input type="checkbox"/> KES 5,001 – 10,000<br><input type="checkbox"/> KES 10,001 – 20,000<br><input type="checkbox"/> KES 20,001 – 30,000<br><input type="checkbox"/> KES 30,001 – 40,000<br><input type="checkbox"/> KES 40,001 – 50,000<br><input type="checkbox"/> above KES 50,000<br>KES = Kenyan Shillings |
| 6. Baby's Father born in                 | Kenya<br><input type="checkbox"/> Yes<br><input type="checkbox"/> No<br><br>If no, how long has he lived in Kenya ____ Years<br>months                                                                                                                                                                                                                             |
| 7. Baby's Father Age                     | ____ Years                                                                                                                                                                                                                                                                                                                                                         |
| 8. Baby's Father ethnic background       | <input type="checkbox"/> Luo<br><input type="checkbox"/> Kuria<br><input type="checkbox"/> Kisii<br><input type="checkbox"/> Mixed/Other                                                                                                                                                                                                                           |
| 9. Baby's Father highest education level | <input type="checkbox"/> No Education<br><input type="checkbox"/> Primary level<br><input type="checkbox"/> Secondary level<br><input type="checkbox"/> Technical college/Trade<br><input type="checkbox"/> Professional college<br><input type="checkbox"/> University Bachelor's degree<br><input type="checkbox"/> University [Master's PhD]                    |
| 10. Baby's Father Occupation             | <input type="checkbox"/> Unemployed<br><input type="checkbox"/> Self employed<br><input type="checkbox"/> Government job<br><input type="checkbox"/> Private job<br><input type="checkbox"/> Other, specify: _____                                                                                                                                                 |
| 11. Baby's Father income per month       | <input type="checkbox"/> Less than KES 5,000<br><input type="checkbox"/> KES 5,001 – 10,000                                                                                                                                                                                                                                                                        |

|                                                                    |                                                                                                                                                                                                                                                                                                                              |
|--------------------------------------------------------------------|------------------------------------------------------------------------------------------------------------------------------------------------------------------------------------------------------------------------------------------------------------------------------------------------------------------------------|
|                                                                    | <input type="checkbox"/> KES 10,001 – 20,000<br><input type="checkbox"/> KES 20,001 – 30,000<br><input type="checkbox"/> KES 30,001 – 40,000<br><input type="checkbox"/> KES 40,001 – 50,000<br><input type="checkbox"/> More than KES 50,000<br><br>KES = Kenyan Shillings                                                  |
| 12. Combined Family Income per Month (net)                         | <input type="checkbox"/> Less than KES 10,000<br><input type="checkbox"/> KES 10,001 – 20,000<br><input type="checkbox"/> KES 20,001 – 30,000<br><input type="checkbox"/> KES 30,001 – 40,000<br><input type="checkbox"/> KES 40,001 – 50,000<br><input type="checkbox"/> More than KES 50,000<br><br>KES = Kenyan Shillings |
| 13. Marital Status                                                 | <input type="checkbox"/> Single<br><input type="checkbox"/> Cohabitation<br><input type="checkbox"/> Traditional Marriage<br><input type="checkbox"/> Civil Marriage<br><input type="checkbox"/> Religious Marriage                                                                                                          |
| 14. As far as you are aware, are you in a polygamous relationship? | <input type="checkbox"/> Yes<br><input type="checkbox"/> No                                                                                                                                                                                                                                                                  |
| 15. Number of families in the house:                               | <input type="checkbox"/> Two or more (e.g. brother-in-law other relatives e.g. uncles, aunts)<br><input type="checkbox"/> No (husband and children only)                                                                                                                                                                     |
| 16. How many people live with you in the house?                    | <div style="text-align: right;">People</div> [Insert number]                                                                                                                                                                                                                                                                 |

|                                                                                               |                                                                                                                                                                                                                                                                                                                                                                                                                                                                                                              |
|-----------------------------------------------------------------------------------------------|--------------------------------------------------------------------------------------------------------------------------------------------------------------------------------------------------------------------------------------------------------------------------------------------------------------------------------------------------------------------------------------------------------------------------------------------------------------------------------------------------------------|
|                                                                                               | <input type="checkbox"/> pill<br><input type="checkbox"/> 3 monthly depo injection<br><input type="checkbox"/> Copper IUD<br><input type="checkbox"/> Standard Days Method<br><input type="checkbox"/> Tubal ligation<br><input type="checkbox"/> other, specify _____                                                                                                                                                                                                                                       |
| 24. Gravid:                                                                                   | <input type="checkbox"/> Primiparous (i.e., first pregnancy)<br><input type="checkbox"/> Multiparous (i.e., given birth $\geq$ two times)<br><br>If multiparous:<br>a) Total number of children: ____<br>b) Previous male<br><input type="checkbox"/> Yes<br><input type="checkbox"/> No<br><br>Previous Preterm birth (<37 weeks)<br><input type="checkbox"/> Yes<br><input type="checkbox"/> No                                                                                                            |
| 25. When was your last baby born?                                                             | ____ Date ____ month ____ Year<br>Calculate Interpregnancy interval<br>Months                                                                                                                                                                                                                                                                                                                                                                                                                                |
| 26. Did you have any significant medical problem/s prior to pregnancy? (Check all that apply) | <input type="checkbox"/> Malaria<br><input type="checkbox"/> HIV<br><input type="checkbox"/> Diabetes<br><input type="checkbox"/> Asthma<br><input type="checkbox"/> Hypertension<br><input type="checkbox"/> History of depression<br><input type="checkbox"/> Other _____                                                                                                                                                                                                                                  |
| 27. Have you had and/or been treated for infections during pregnancy?                         | <input type="checkbox"/> Yes<br><input type="checkbox"/> No<br>If yes, which (Circle all that apply)<br><br><input type="checkbox"/> Vaginal infections<br><input type="checkbox"/> Urinary tract infections<br><input type="checkbox"/> Dental related infections<br><input type="checkbox"/> Sexually transmitted infections<br><input type="checkbox"/> Respiratory infections (e.g. pneumonia, bronchitis)<br><input type="checkbox"/> Fever episodes<br><input type="checkbox"/> Flu/Cold like symptoms |

|                                                                                                                             |                                                                                                                                                                                                                                                                                                                                                                                                                                                                                                                                                                                                                                                                            |
|-----------------------------------------------------------------------------------------------------------------------------|----------------------------------------------------------------------------------------------------------------------------------------------------------------------------------------------------------------------------------------------------------------------------------------------------------------------------------------------------------------------------------------------------------------------------------------------------------------------------------------------------------------------------------------------------------------------------------------------------------------------------------------------------------------------------|
| <p>36. Since becoming pregnant, have you at any point been subjected to violence or violent behavior from your partner?</p> | <div data-bbox="662 184 917 241" style="text-align: center;">  </div> <p><input type="checkbox"/> Yes<br/> <input type="checkbox"/> No</p> <p>If yes, what type of violence were you exposed to?</p> <p><input type="checkbox"/> Intense verbal abuse<br/> <input type="checkbox"/> Slapping and kicking<br/> <input type="checkbox"/> Major physical injuries requiring medical attention<br/> <input type="checkbox"/> Forced sexual activity<br/> <input type="checkbox"/> Evicted from homestead to go and live with other relatives<br/> <input type="checkbox"/> Other, specify</p> |
| <p>38. How do you cope when you feel "stressed"?</p>                                                                        | <p><input type="checkbox"/> I develop my own inner strength to cope<br/> <input type="checkbox"/> I mostly share my problems with my close friends and family (e.g. mother, sister, mother-in-law, sister-in-law etc.)<br/> <input type="checkbox"/> I go to church and attend religious meetings<br/> <input type="checkbox"/> I go to live with family or friends who are welcoming<br/> <input type="checkbox"/> Other, specify</p>                                                                                                                                                                                                                                     |

Table S2. The Perceived Stress Scale (PSS-10)

**The questions in this scale ask you about your feelings and thoughts during the last month. In each case, you will be asked to indicate by circling *how often* you felt or thought a certain way.**

Name \_\_\_\_\_ Date \_\_\_\_\_

Age \_\_\_\_\_ Gender (*Circle*): **M** **F** Other \_\_\_\_\_

**0 = Never    1 = Almost Never    2 = Sometimes    3 = Fairly Often    4 = Very Often**

- |                                                                                                                      |   |   |   |   |   |
|----------------------------------------------------------------------------------------------------------------------|---|---|---|---|---|
| 1. In the last month, how often have you been upset because of something that happened unexpectedly?                 | 0 | 1 | 2 | 3 | 4 |
| 2. In the last month, how often have you felt that you were unable to control the important things in your life?     | 0 | 1 | 2 | 3 | 4 |
| 3. In the last month, how often have you felt nervous and "stressed"?                                                | 0 | 1 | 2 | 3 | 4 |
| 4. In the last month, how often have you felt confident about your ability to handle your personal problems?         | 0 | 1 | 2 | 3 | 4 |
| 5. In the last month, how often have you felt that things were going your way?                                       | 0 | 1 | 2 | 3 | 4 |
| 6. In the last month, how often have you found that you could not cope with all the things that you had to do?       | 0 | 1 | 2 | 3 | 4 |
| 7. In the last month, how often have you been able to control irritations in your life?                              | 0 | 1 | 2 | 3 | 4 |
| 8. In the last month, how often have you felt that you were on top of things?                                        | 0 | 1 | 2 | 3 | 4 |
| 9. In the last month, how often have you been angered because of things that were outside of your control?           | 0 | 1 | 2 | 3 | 4 |
| 10. In the last month, how often have you felt difficulties were piling up so high that you could not overcome them? | 0 | 1 | 2 | 3 | 4 |

Table S3. Prenatal Medical Risk Index

*Use 0 if not present, 1 if present*

Unusual features of pregnancy

1. \_\_\_\_ diabetes (current or past)
2. \_\_\_\_ heart disease (current or past)
3. \_\_\_\_ polyhydramnios
4. \_\_\_\_ communicable disease
5. \_\_\_\_ Rh negative

Gynecological and obstetric history

6. \_\_\_\_ 5 or more past deliveries
7. \_\_\_\_ previous fetal demise
8. \_\_\_\_ previous stillbirth
9. \_\_\_\_ previous preterm delivery
10. \_\_\_\_ previous 2<sup>nd</sup> trimester spontaneous abortion
11. \_\_\_\_ 3 or more previous 1<sup>st</sup> trimester spontaneous abortions
12. \_\_\_\_ 2 or more therapeutic abortions

Complications of past pregnancies

13. \_\_\_\_ hemorrhage
14. \_\_\_\_ placenta previa
15. \_\_\_\_ pregnancy induced hypertension
16. \_\_\_\_ pre-eclampsia (toxemia)
17. \_\_\_\_ gestational diabetes

Family history

18. \_\_\_\_ diabetes

Patient history (can be identified in current pregnancy as long as not counted twice)

- 19. \_\_\_\_ hypertension
- 20. \_\_\_\_ pulmonary disease (or current asthma)
- 21. \_\_\_\_ genito-urinary infections
- 22. \_\_\_\_ renal disease
- 23. \_\_\_\_ epilepsy
- 24. \_\_\_\_ uterine surgery
- 25. \_\_\_\_ uterine or cervical abnormality
- 26. \_\_\_\_ herpes

Current pregnancy complaints

- 27. \_\_\_\_ anemia
- 28. \_\_\_\_ flu syndrome
- 29. \_\_\_\_ genito-urinary infections
- 30. \_\_\_\_ incompetent cervix
- 31. \_\_\_\_ alcohol abuse
- 32. \_\_\_\_ substance abuse
- 33. \_\_\_\_ placenta previa
- 34. \_\_\_\_ postmaturity
- 35. \_\_\_\_ threatened abortion
- 36. \_\_\_\_ tobacco use
- 37. \_\_\_\_ second or third trimester bleeding
- \_\_\_\_ TOTAL Prenatal Risk
